# Supplementary material
Source: PubMed Central journal article supplement (PMC2900530)
Supplement: NIHMS189859-supplement-Supplementary_Data.pdf [file NIHMS189859-supplement-Supplementary_Data.pdf]

**Figure S1**

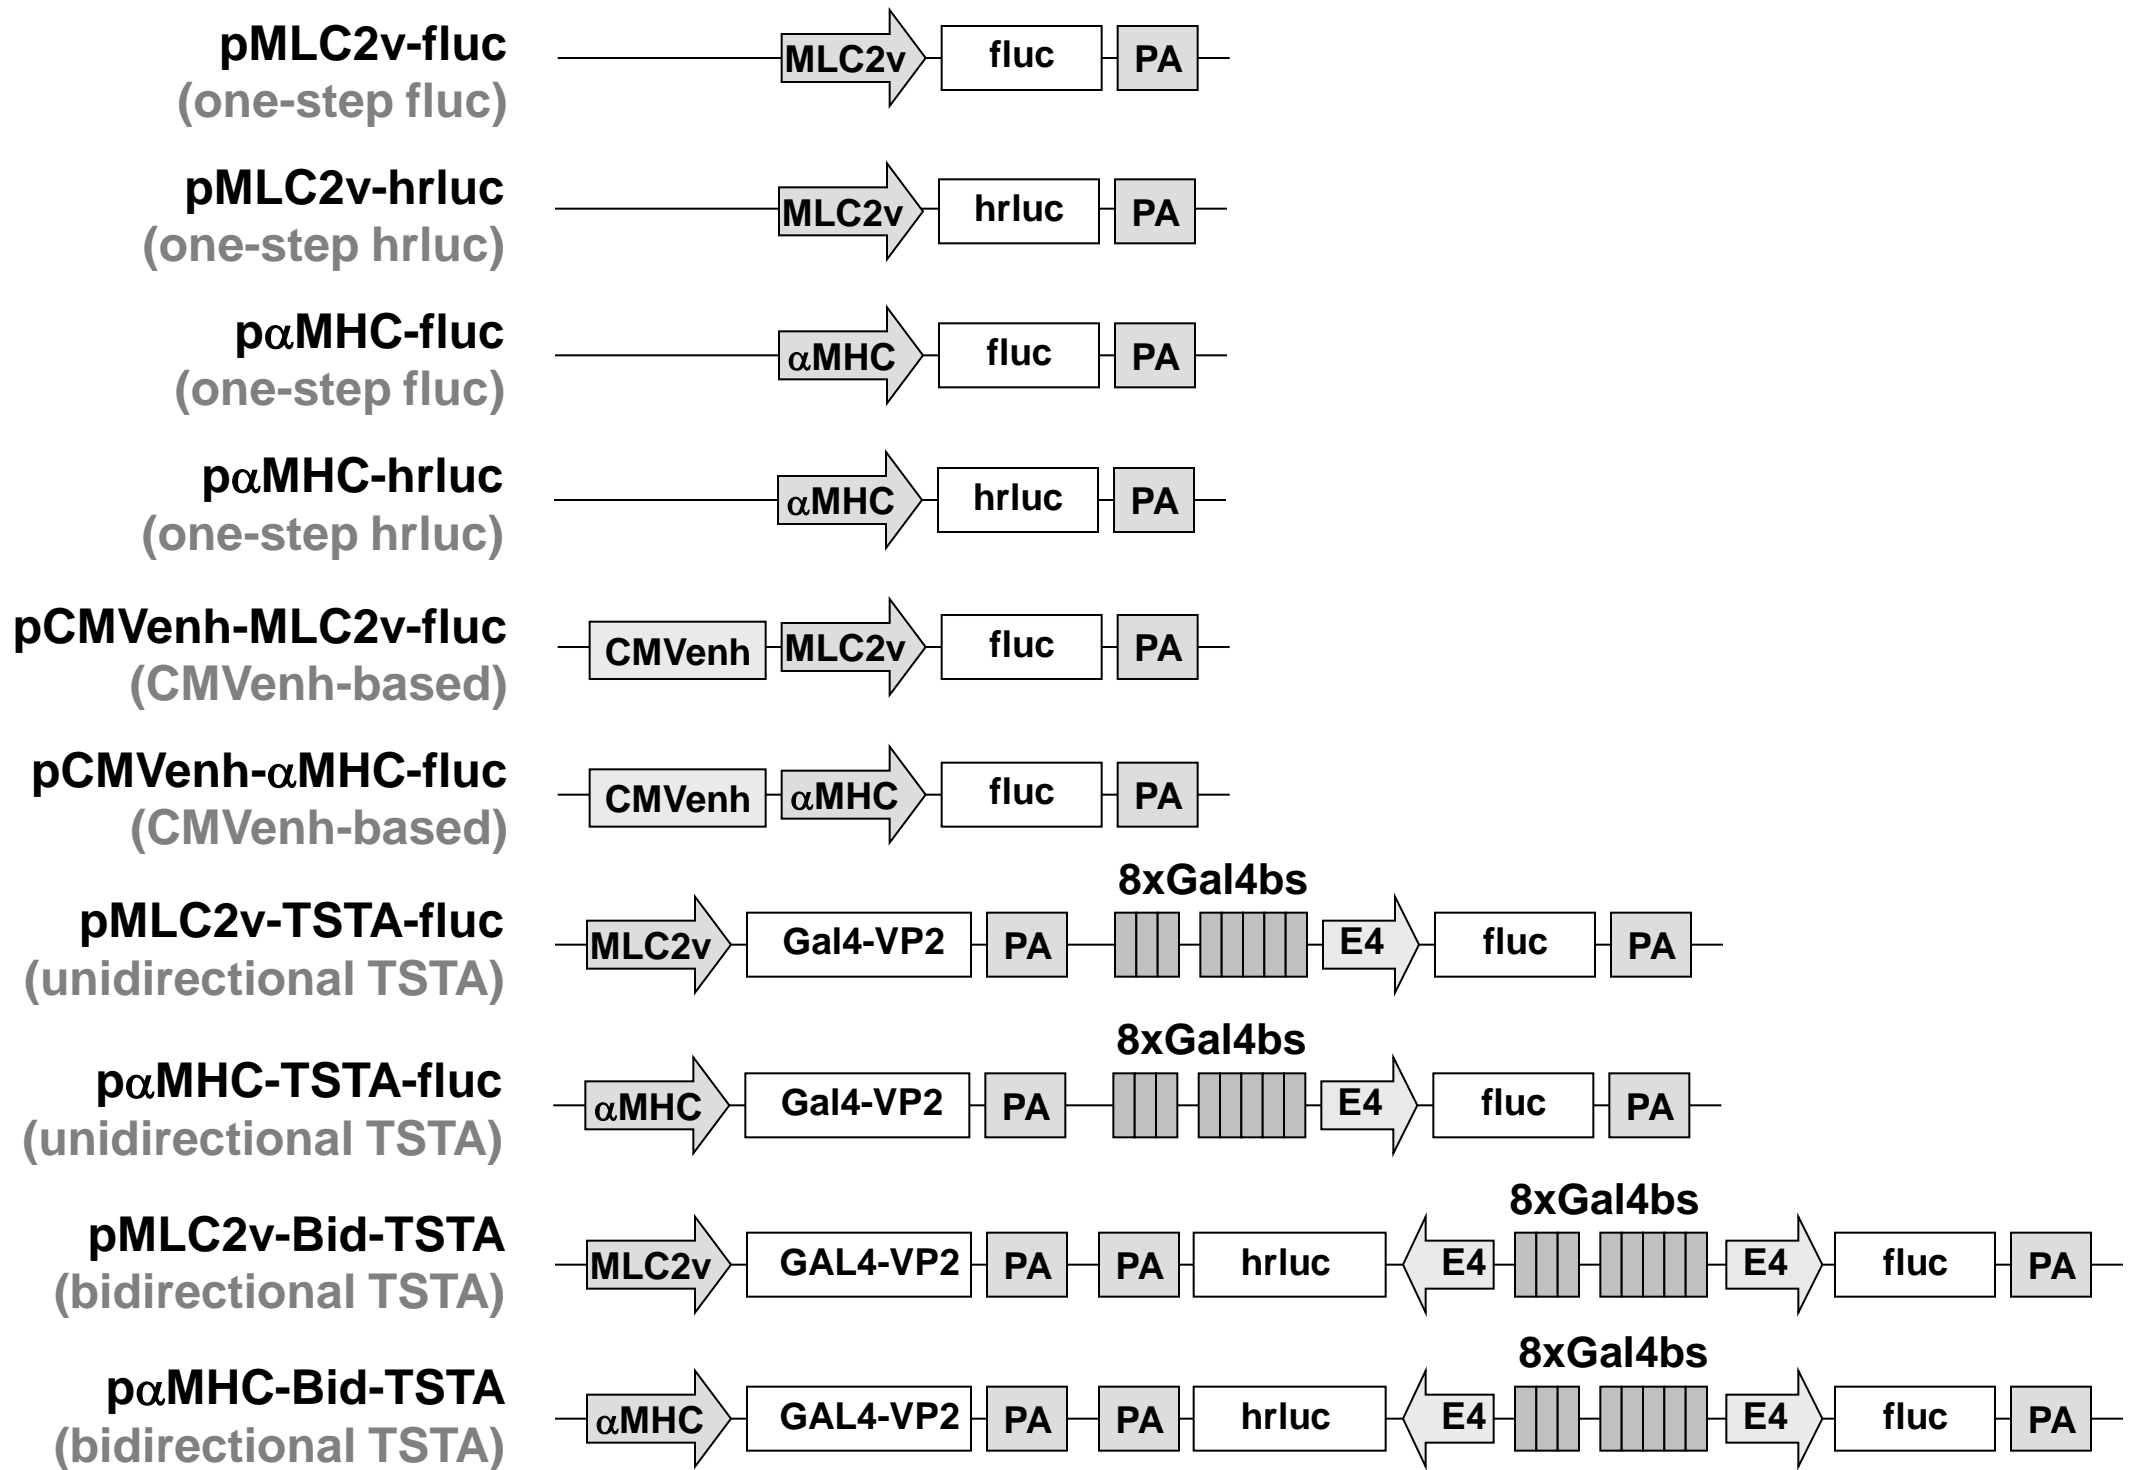

Figure S2

A

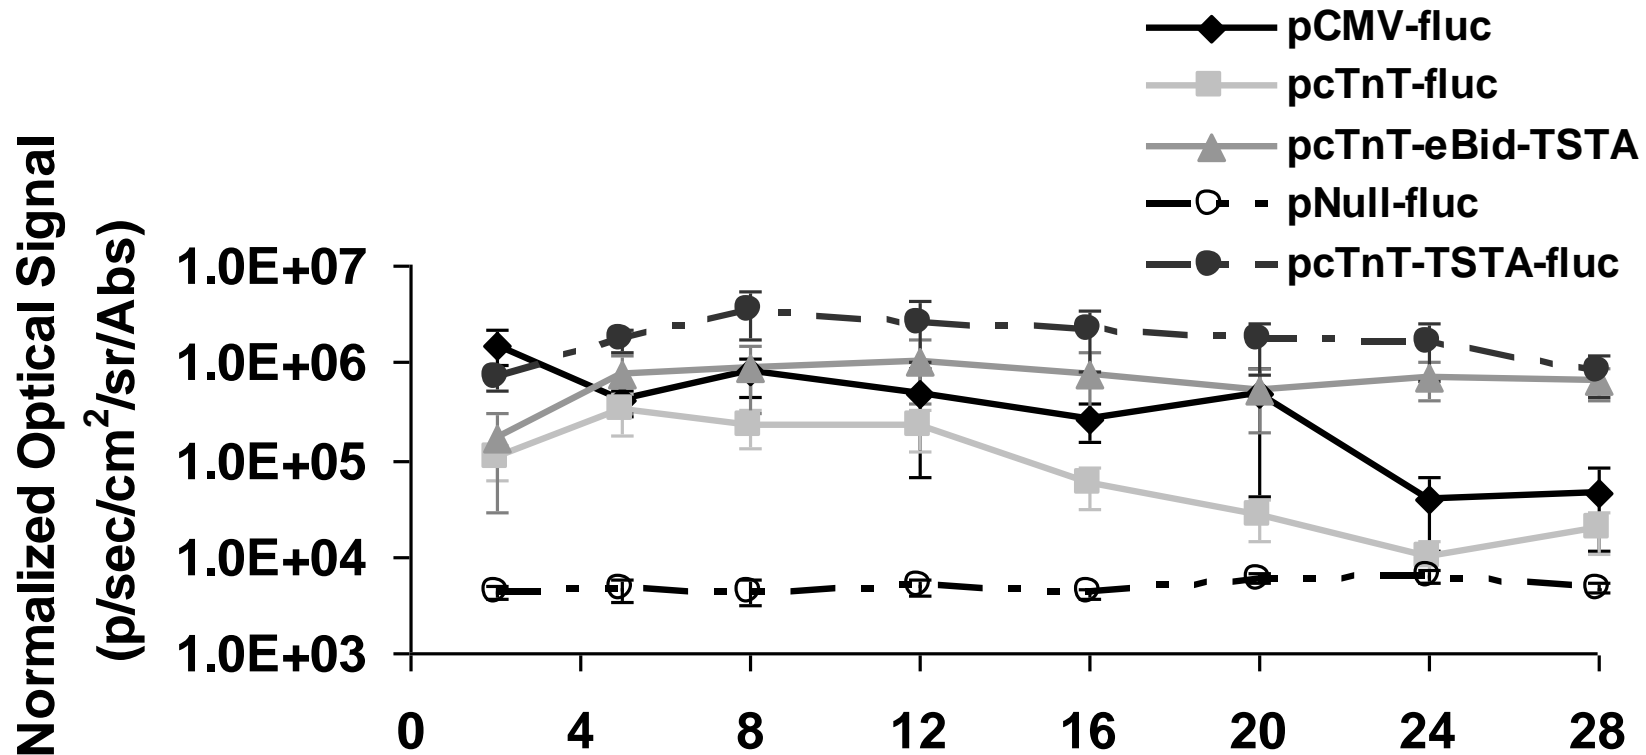

B

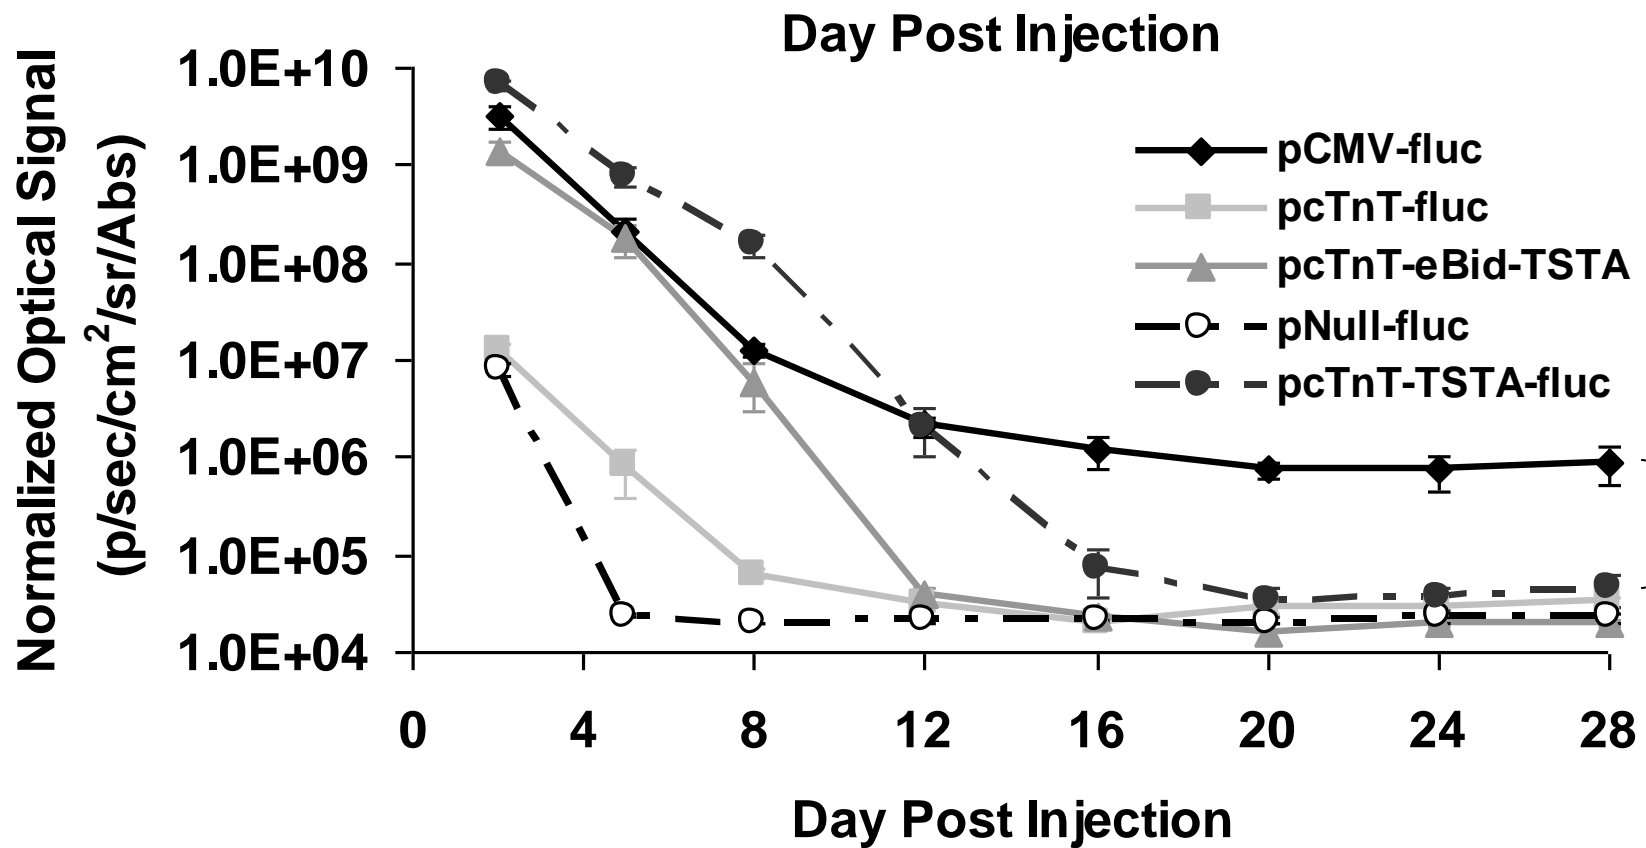

Figure S3

A

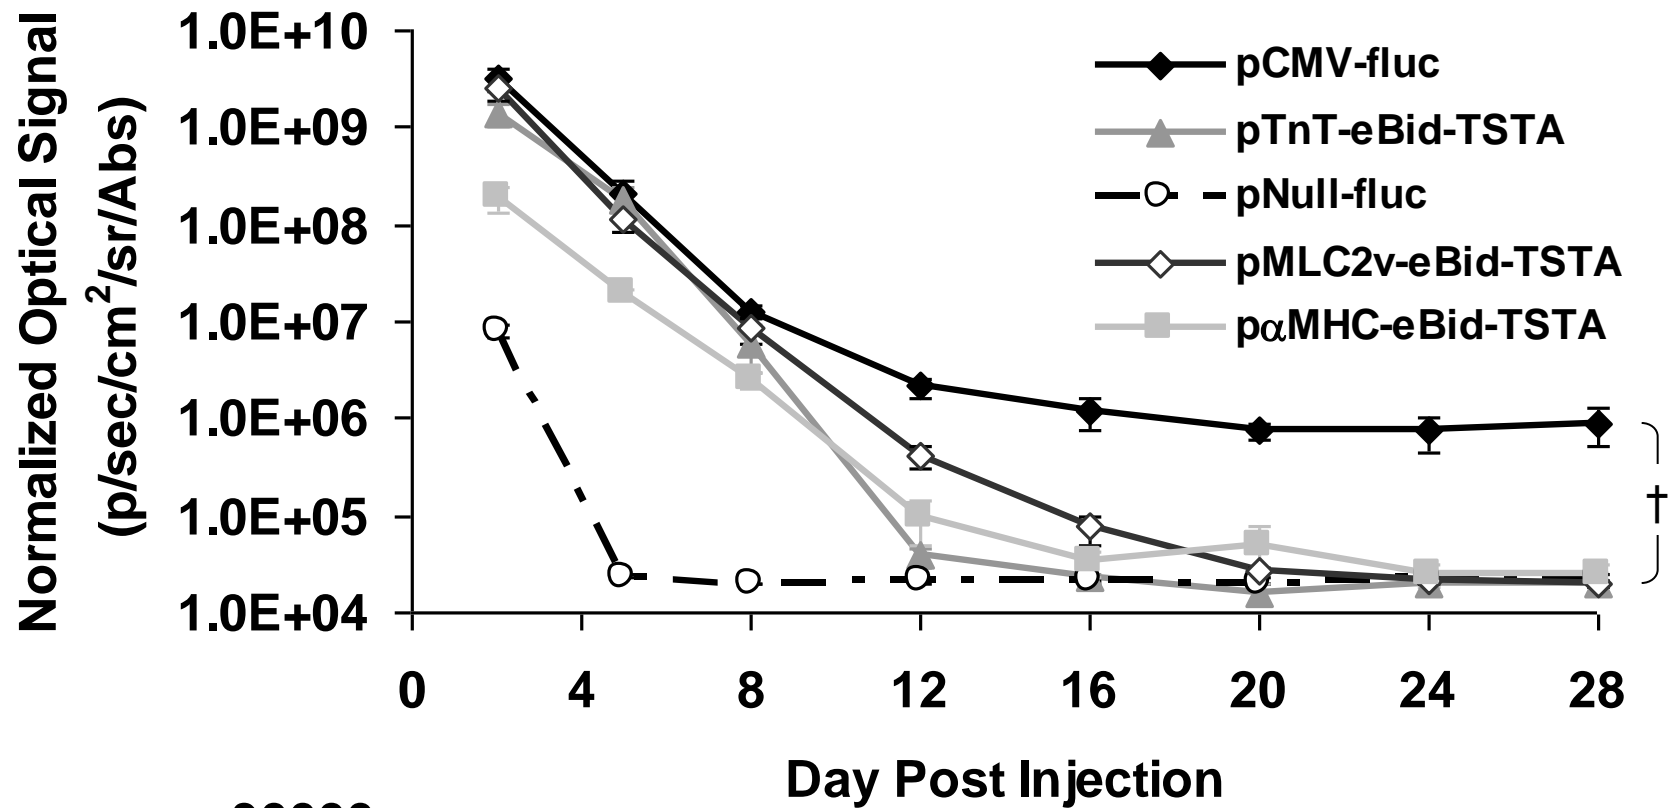

B

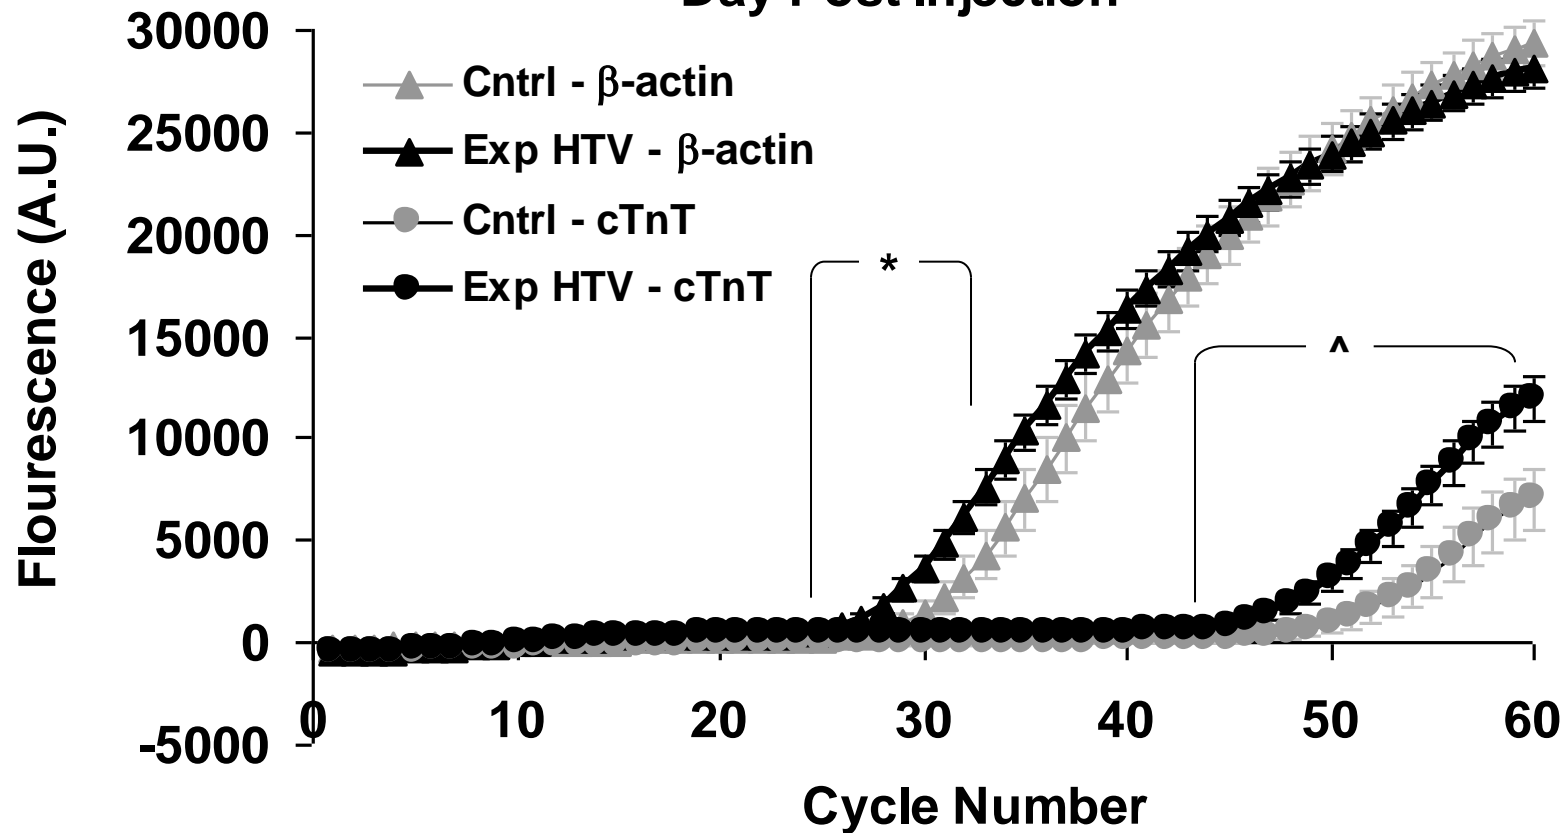

Figure S4

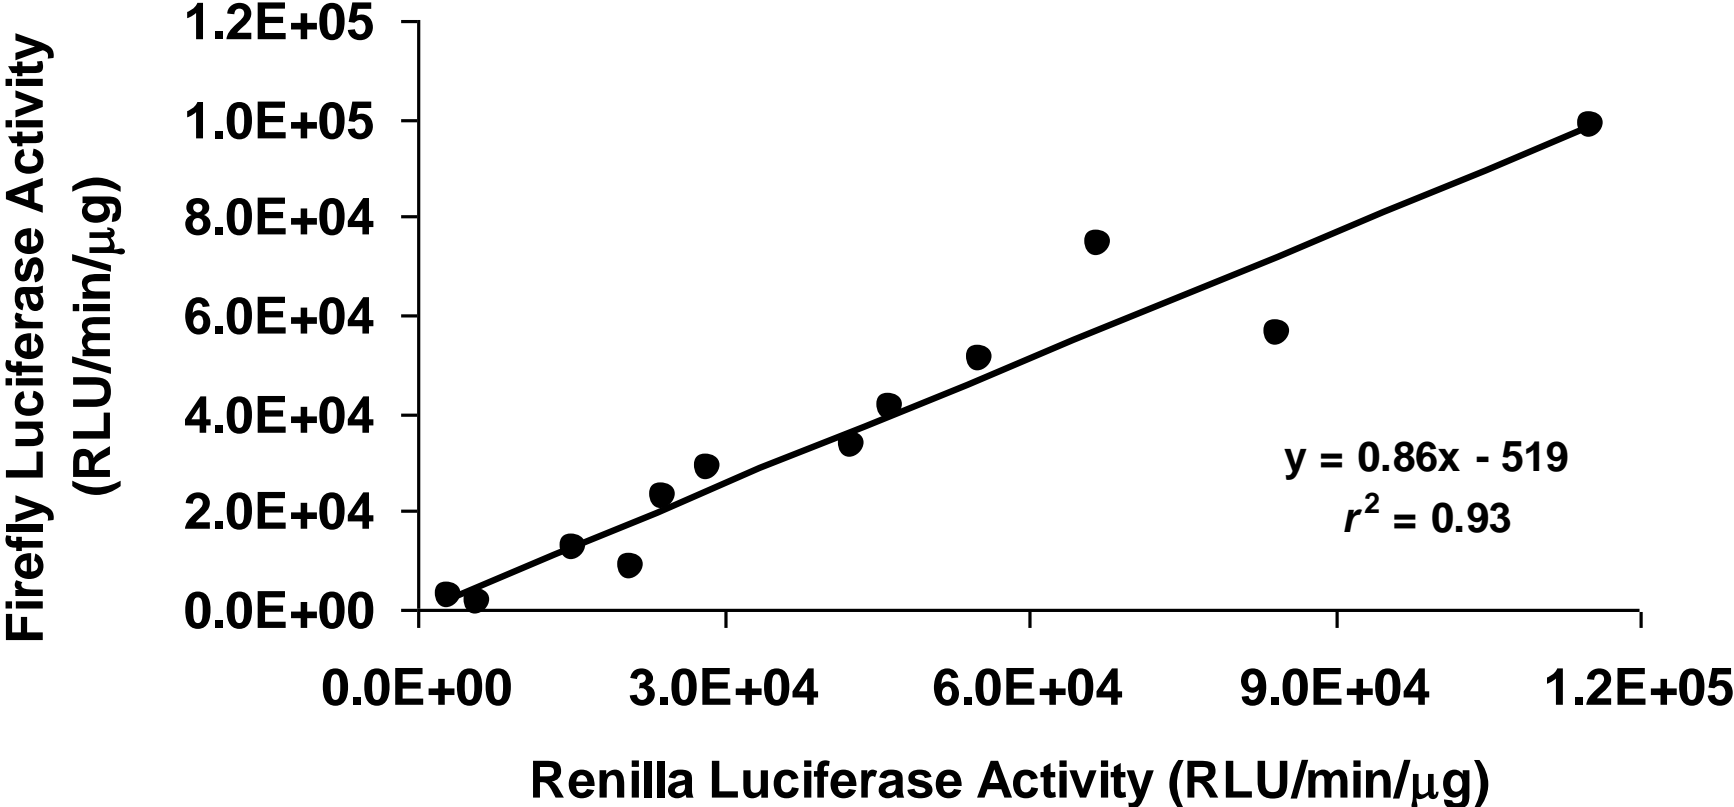

**Table S1**

| <b>Plasmid Vectors</b> | <b>FLuc Activity<br/>(% pCMV-fluc)</b> | <b>RLuc Activity<br/>(% pCMV-hrluc)</b> |
|------------------------|----------------------------------------|-----------------------------------------|
| pNull-fluc             | 0.2 ± 0.0                              | 0.0 ± 0.0                               |
| pCMV-fluc              | 100.0 ± 6.4                            | 0.0 ± 0.0                               |
| pNull-hrluc            | 0.0 ± 0.0                              | 1.2 ± 0.1                               |
| pCMV-hrluc             | 0.0 ± 0.0                              | 100.0 ± 5.3                             |
| pMLC2v-fluc            | 0.2 ± 0.0                              | 0.0 ± 0.0                               |
| pαMHC-fluc             | 4.6 ± 0.1                              | 0.0 ± 0.0                               |
| pMLC2v-hrluc           | 0.0 ± 0.0                              | 0.3 ± 0.0                               |
| pαMHC-hrluc            | 0.0 ± 0.0                              | 3.6 ± 0.2                               |
| pCMVenh-MLC2v-fluc     | 28.4 ± 1.0                             | 0.0 ± 0.0                               |
| pCMVenh-αMHC-fluc      | 48.3 ± 1.1                             | 0.0 ± 0.0                               |
| pMLC2v-TSTA-fluc       | 14.8 ± 1.6*                            | 0.0 ± 0.0                               |
| pαMHC-TSTA-fluc        | 125.4 ± 15.6*                          | 0.0 ± 0.0                               |
| pMLC2v-Bid-TSTA        | 3.1 ± 0.3^                             | 1.1 ± 0.1                               |
| pαMHC-Bid-TSTA         | 32.3 ± 0.5^                            | 44.3 ± 1.0                              |

**Table S2**

| <b>Plasmid Vectors</b> | <b>Cardiac Specificity Index</b> |
|------------------------|----------------------------------|
| pNull-fluc             | 3.1 ± 0.3                        |
| pCMV-fluc              | 1.0 ± 0.2                        |
| pMLC2v-fluc            | 1.9 ± 0.4                        |
| pαMHC-fluc             | 7.2 ± 0.8                        |
| pCMVenh-MLC2v-fluc     | 0.6 ± 0.0                        |
| pCMVenh-αMHC-fluc      | 1.9 ± 0.2*                       |
| pMLC2v-TSTA-fluc       | 1.4 ± 0.3                        |
| pαMHC-TSTA-fluc        | 4.1 ± 0.8* ^                     |
| pMLC2v-Bid-TSTA        | 0.4 ± 0.1* †                     |
| pαMHC-Bid-TSTA         | 1.6 ± 0.2* †                     |

## **Titles and Legends to Supplementary Figure and Tables**

**Figure S1 Schematics of experimental vectors containing either MLC2v or  $\alpha$ MHC.** Abbreviations: MLC2v, rat ventricular myosin light chain 2 promoter; fluc, firefly luciferase gene; PA, SV40 poly(A) tail; hrluc, synthetic Renilla luciferase gene;  $\alpha$ MHC, rat alpha-myosin heavy chain promoter; CMVenh, cytomegalovirus enhancer; TSTA, two-step transcriptional amplification; Gal4-VP2, fusion gene combining yeast Gal4 and two tandem repeats of herpes simplex virus VP16; 8xGal4bs, 8 repeats of Gal4 binding sites; E4, adenovirus E4 minimal promoter; CMV, cytomegalovirus promoter.

**Figure S2 *In vivo* bioluminescence assessment of pcTnT-TSTA-fluc following intramyocardial or hydrodynamic tail vein injection.** Serial BLI was performed on mice that had undergone either intramyocardial co-injections of pcTnT-TSTA-fluc and pCMV- $\beta$ -gal or mice that had received the same treatments except via HTV administration. **(a)** The average heart signal (dark gray circle, dashed line) following intramyocardial vector administration was normalized by transfection efficiency ( $\beta$ -gal expression), plotted for the post-operative days shown, and superimposed on **Figure 3b** for comparison with other animal groups receiving different plasmids. **(b)** The average normalized hepatic signal (dark gray circle, dashed line) following HTV vector injection is plotted in the same fashion and superimposed on **Figure 4b** for comparison with other animal groups. The error bars represent SEM for 5 animals.  $^{\wedge}P < 0.0001$  between pCMV-fluc and pcTnT-TSTA-fluc (or any other group) between days 16 and 28.

**Figure S3 Acute effects of hydrodynamic tail vein injection on hepatic gene expression.** Mice received hydrodynamic tail vein co-injections of 1) p $\alpha$ MHC-eBid-TSTA + pCMV- $\beta$ -gal, 2) pMLC2v-eBid-TSTA + pCMV- $\beta$ -gal, or injection of PBS alone. BLI was used to assess longitudinal hepatic fluc expression in the first 2 mouse groups, whereas qRT-PCR was used in the last group to assess for hepatic cTnT mRNA and  $\beta$ -actin mRNA 48 hr after injection of PBS. **(a)** The average hepatic signal normalized by transfection efficiency ( $\beta$ -gal expression) is specifically plotted for mouse groups corresponding to

p $\alpha$ MHC-eBid-TSTA (light gray square) and pMLC2v-eBid-TSTA (empty diamond). The plots are superimposed on selected plots from **Figure 4b** for easier comparison. The error bars represent SEM for 5 animals. † $P < 0.0001$  between pCMV-fluc and p $\alpha$ MHC-eBid-TSTA (or pMLC2v-eBid-TSTA) from days 20 to 28. **(b)** The average real-time fluorescence intensity for the cycle numbers indicated is plotted for both the cTnT mRNA (circle) and the  $\beta$ -actin mRNA (triangle) from either livers exposed to PBS (black) or livers from intact control mice (gray). The error bars represent SEM for 7 liver samples. \* $P < 0.05$  between “Cntrl -  $\beta$ -actin” and “Exp HTV -  $\beta$ -actin” for PCR cycles 26-33. ^ $P < 0.05$  between “Cntrl - cTnT” and “Exp HTV - cTnT” for PCR cycles 44-60.

**Figure S4 *Ex vivo* correlation between FLuc and RLuc/M185V enzyme activities.** Mice intramyocardially injected with pCtnt-eBid-TSTA were euthanized at various time points, with their heart homogenates assayed for FLuc and RLuc/M185V enzyme activities, which were normalized to total protein and plotted against each other.

**Table S1 *In vitro* fluc and hrluc expression of MLC2v- or  $\alpha$ MHC-containing vectors.** HL-1 cells were separately co-transfected with each of the vectors listed and pCMV- $\beta$ -gal, and assayed for FLuc, RLuc, and  $\beta$ -GAL activities 24 hr later. The FLuc and RLuc activities were normalized to total protein, corrected for transfection efficiency ( $\beta$ -GAL activity), and expressed as a percentage of pCMV-fluc and pCMV-hrluc, respectively. Data are presented as mean $\pm$ SEM % for triplicate determinations. \* $P < 0.02$  compared to CMVenh-based vector of the same promoter; ^ $P < 0.03$  compared to unidirectional TSTA vector of the same promoter.

**Table S2 Cardiac specificity index of experimental vectors containing either MLC2v or  $\alpha$ MHC.** Cardiac (HL-1) and non-cardiac cells (C2C12, Hepa1-6 and NIH3T3) were co-transfected with each of the vectors listed and pCMV- $\beta$ -gal, and assayed 24 hr later for FLuc, RLuc, and  $\beta$ -GAL activities. The



FLuc activity was normalized to total protein, corrected for transfection efficiency ( $\beta$ -GAL activity), and used to calculate a cardiac-specificity index (CSI) for each vector. The CSI measures the cardiac specificity of a given vector relative to pCMV-fluc. Data are expressed as mean $\pm$ SEM for triplicate determinations. \* $P$ <0.05 compared to one-step vector of the same promoter; ^ $P$ <0.05 compared to CMVenh-based vector of the same promoter; † $P$ <0.04 compared to unidirectional TSTA vector of the same promoter.
